# Supplementary material
Source: publisher figshare collection journal article supplement (https://acs.figshare.com/ndownloader/files/21359676)
Supplement: Supplementary file 1 [file 21359676]

**Supporting Information for**

**Local Order and Rotational Dynamics in Mixed**

**A-Cation Lead Iodide Perovskites**

Giuseppe Fisicaro, Antonino La Magna, Alessandra Alberti, Emanuele Smecca,  
Giovanni Mannino, and Ioannis Deretzis\*

*Istituto per la Microelettronica e Microsistemi (CNR-IMM), Z.I. VIII strada 5, 95121  
Catania, Italy*

E-mail: [ioannis.deretzis@imm.cnr.it](mailto:ioannis.deretzis@imm.cnr.it)

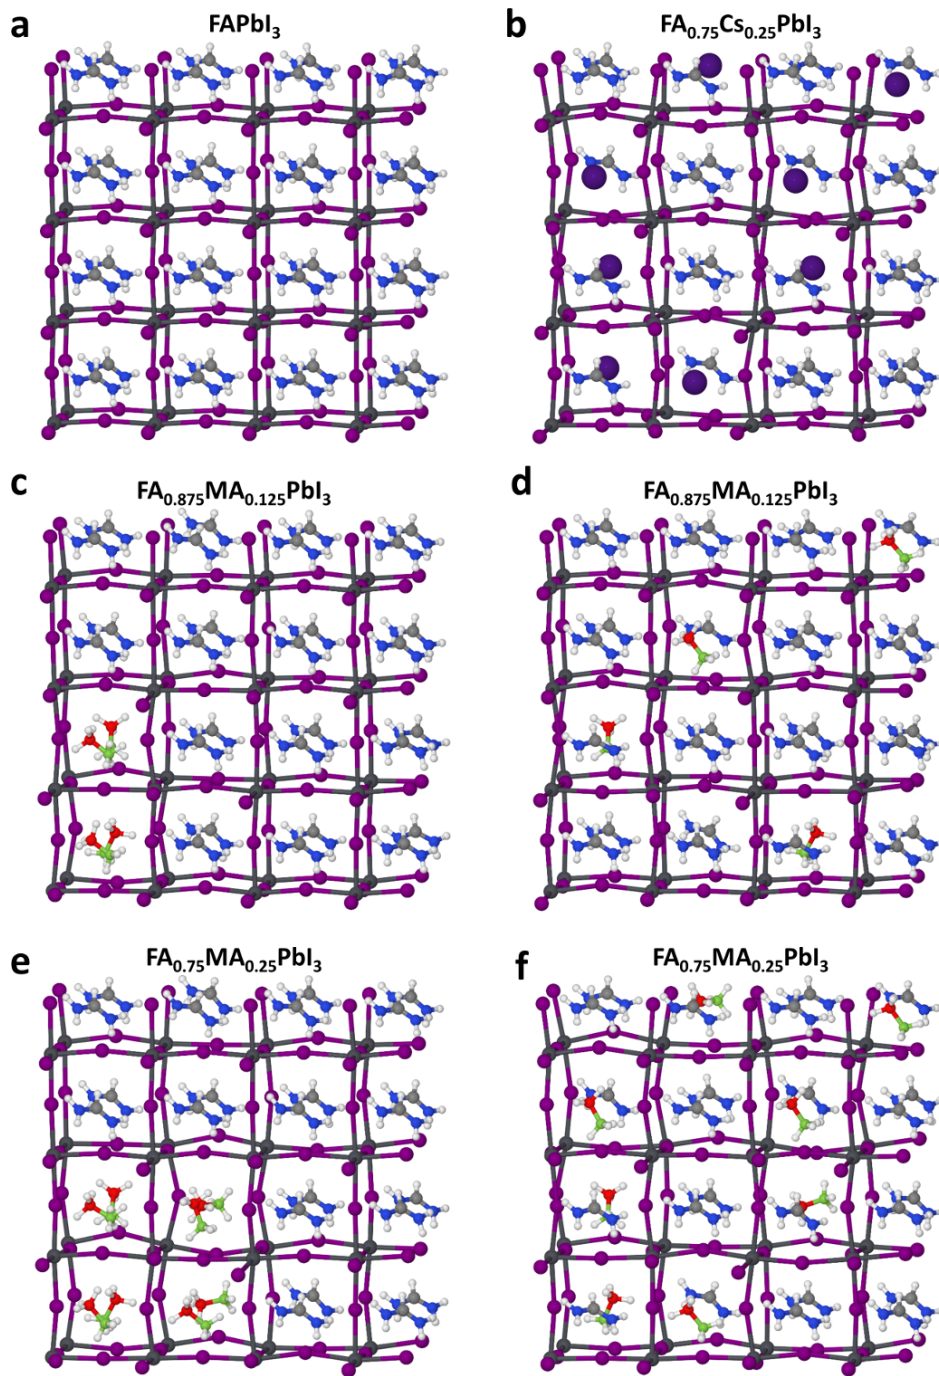

Figure S1: Initial configurations used for the molecular dynamics calculations. (a)  $\text{FAPbI}_3$ , (b)  $\text{FA}_{0.75}\text{Cs}_{0.25}\text{PbI}_3$ , (c)  $\text{FA}_{0.875}\text{MA}_{0.125}\text{PbI}_3$  with the  $\text{MA}^+$  ions clustered in the corner of the computational box (d)  $\text{FA}_{0.875}\text{MA}_{0.125}\text{PbI}_3$  with the  $\text{MA}^+$  ions homogeneously distributed within the computational box, (e)  $\text{FA}_{0.75}\text{MA}_{0.25}\text{PbI}_3$  with the  $\text{MA}^+$  ions clustered in the corner of the computational box (f)  $\text{FA}_{0.75}\text{MA}_{0.25}\text{PbI}_3$  with the  $\text{MA}^+$  ions homogeneously distributed within the computational box. Periodic boundary conditions are applied in all cases. The C and N atoms of  $\text{MA}^+$  and  $\text{FA}^+$  have different colors for clarity.

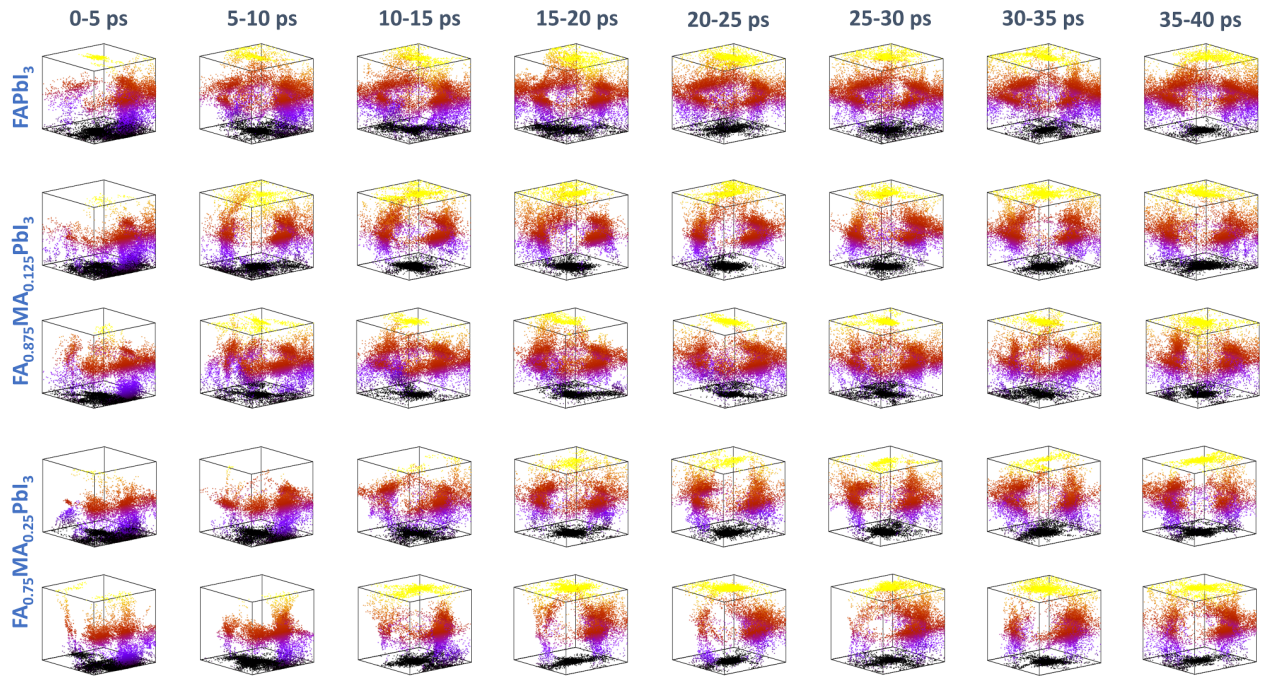

Figure S2: Orientations of the molecular dipoles of the  $\text{FA}^+$  cations projected on the cubic inorganic cage for every 5 ps of simulation time. From upper to lower:  $\text{FAPbI}_3$ ,  $\text{FA}_{0.875}\text{MA}_{0.125}\text{PbI}_3$  with the  $\text{MA}^+$  ions homogeneously distributed within the computational box,  $\text{FA}_{0.875}\text{MA}_{0.125}\text{PbI}_3$  with the  $\text{MA}^+$  ions clustered in the corner of the computational box,  $\text{FA}_{0.75}\text{MA}_{0.25}\text{PbI}_3$  with the  $\text{MA}^+$  ions homogeneously distributed within the computational box,  $\text{FA}_{0.75}\text{MA}_{0.25}\text{PbI}_3$  with the  $\text{MA}^+$  ions clustered in the corner of the computational box.

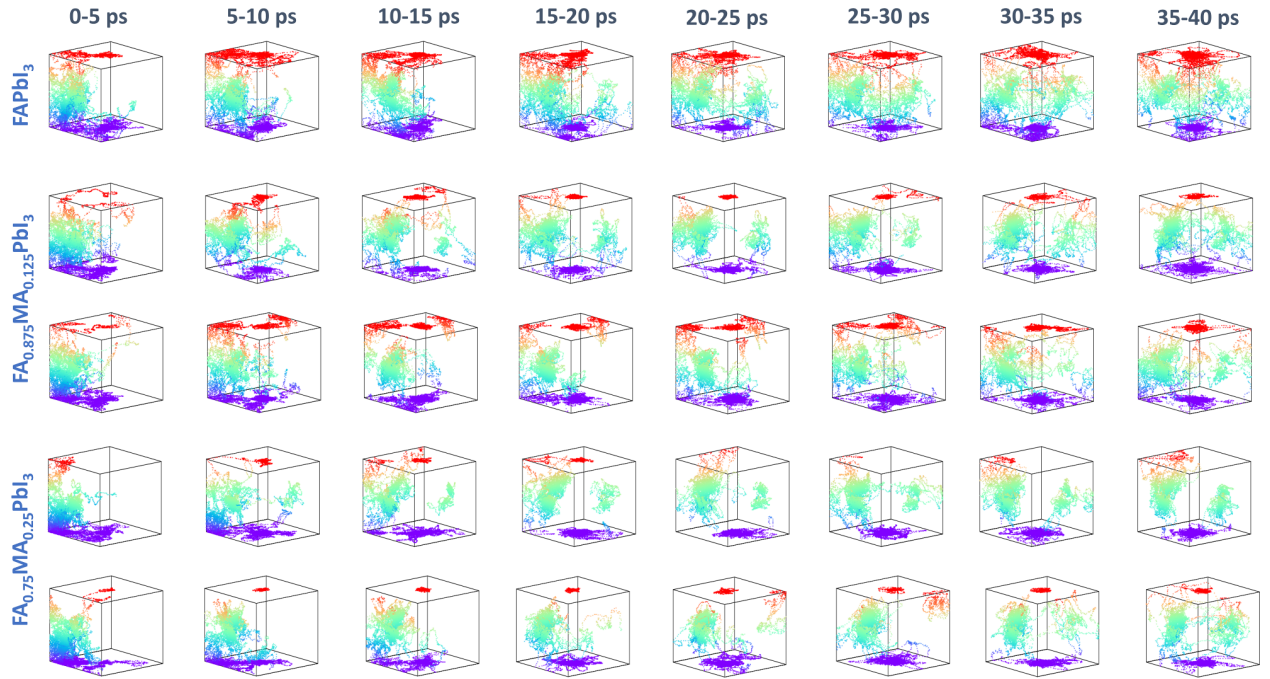

Figure S3: Orientations of the N-N axes of the  $\text{FA}^+$  cations projected on the cubic inorganic cage for every 5 ps of simulation time. From upper to lower:  $\text{FAPbI}_3$ ,  $\text{FA}_{0.875}\text{MA}_{0.125}\text{PbI}_3$  with the  $\text{MA}^+$  ions homogeneously distributed within the computational box,  $\text{FA}_{0.875}\text{MA}_{0.125}\text{PbI}_3$  with the  $\text{MA}^+$  ions clustered in the corner of the computational box,  $\text{FA}_{0.75}\text{MA}_{0.25}\text{PbI}_3$  with the  $\text{MA}^+$  ions homogeneously distributed within the computational box,  $\text{FA}_{0.75}\text{MA}_{0.25}\text{PbI}_3$  with the  $\text{MA}^+$  ions clustered in the corner of the computational box.

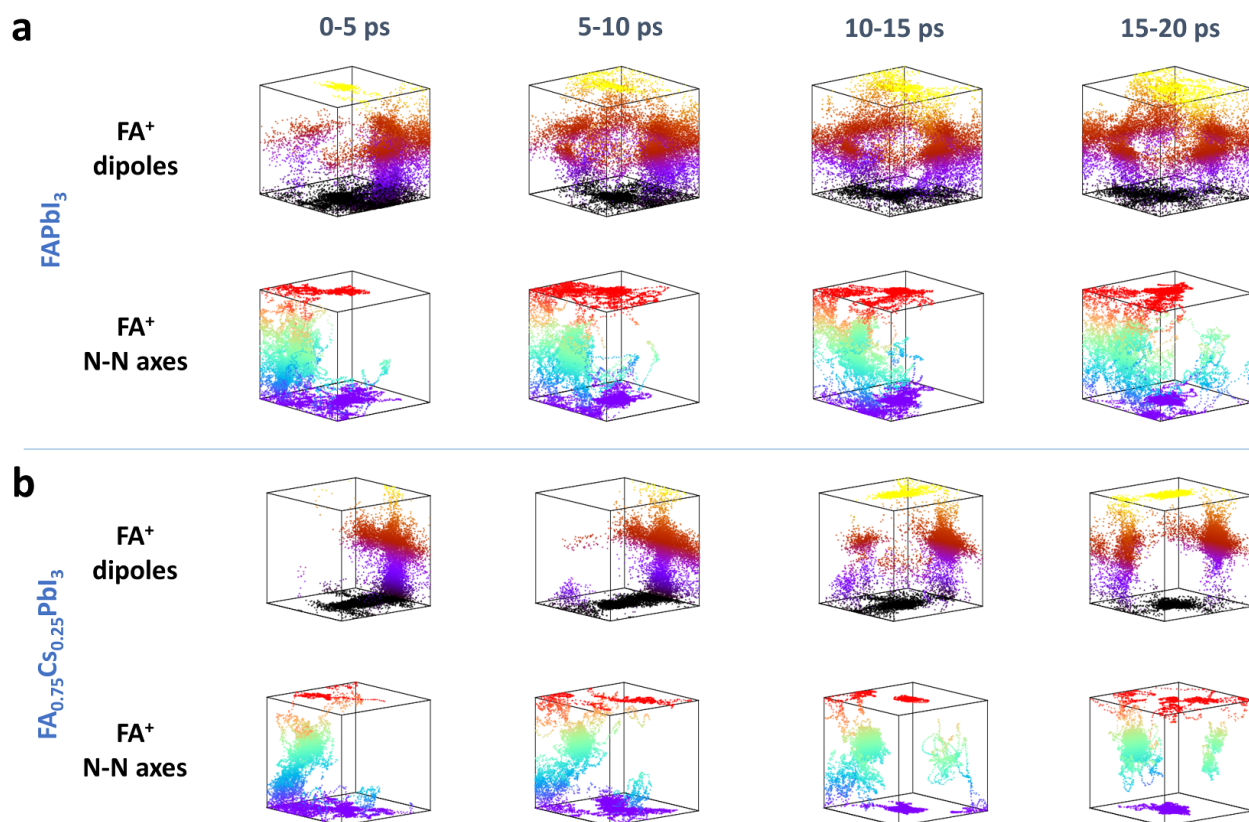

Figure S4: Orientations of the molecular dipoles (upper) and the N-N axes (lower) of the FA<sup>+</sup> cations projected on the cubic inorganic cage for every 5 ps of simulation time in the case of (a) FAPbI<sub>3</sub> and (b) FA<sub>0.75</sub>Cs<sub>0.25</sub>PbI<sub>3</sub>.



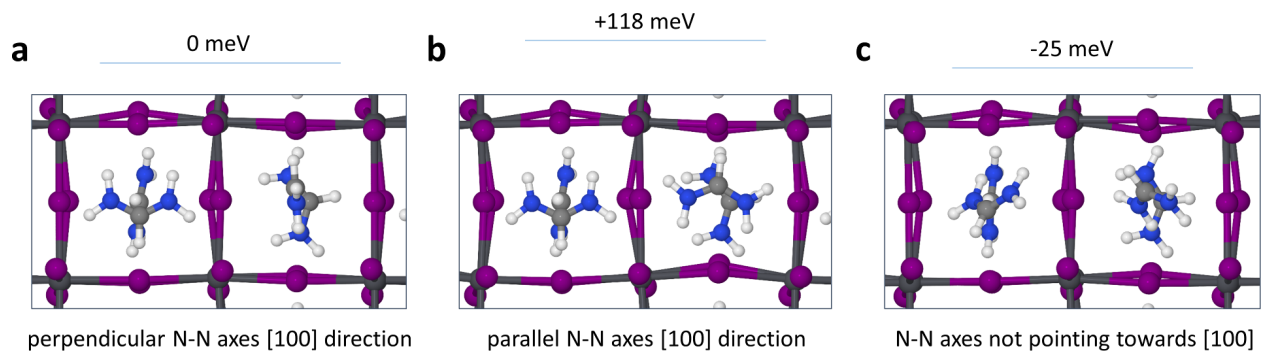

Figure S5: Comparison of the ground state energy for a  $\text{FAPbI}_3$  system in a  $2 \times 2 \times 2$  supercell having two of the  $\text{FA}^+$  cations with (a) perpendicular N-N axes pointing towards  $\langle 100 \rangle$  directions, (b) parallel N-N axes pointing towards the same  $[100]$  direction and (c) N-N axes not pointing towards  $\langle 100 \rangle$  directions.
